# Supplementary material for: Ultra Deep Sequencing of Listeria monocytogenes sRNA Transcriptome Revealed New Antisense RNAs
Source: PubMed Central journal article supplement (PMC3911899; doi:10.1371/journal.pone.0083979), 2014-02-03

# anti0466

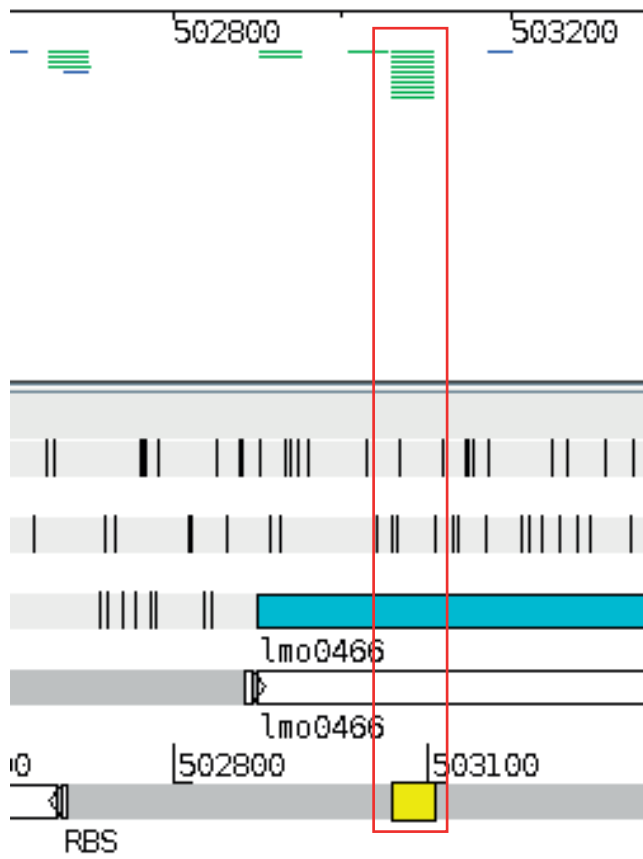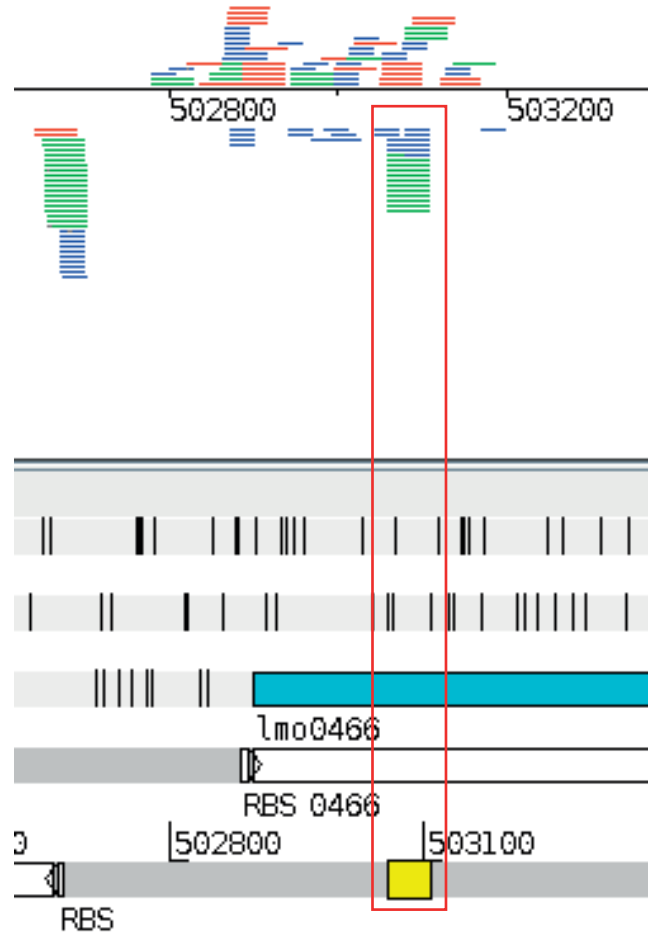

# anti2106

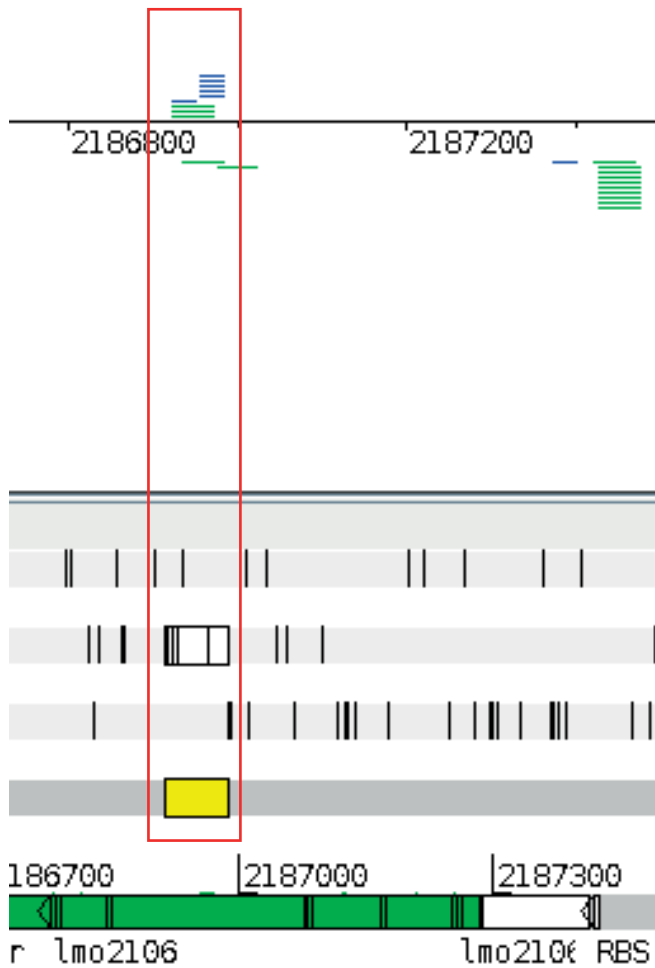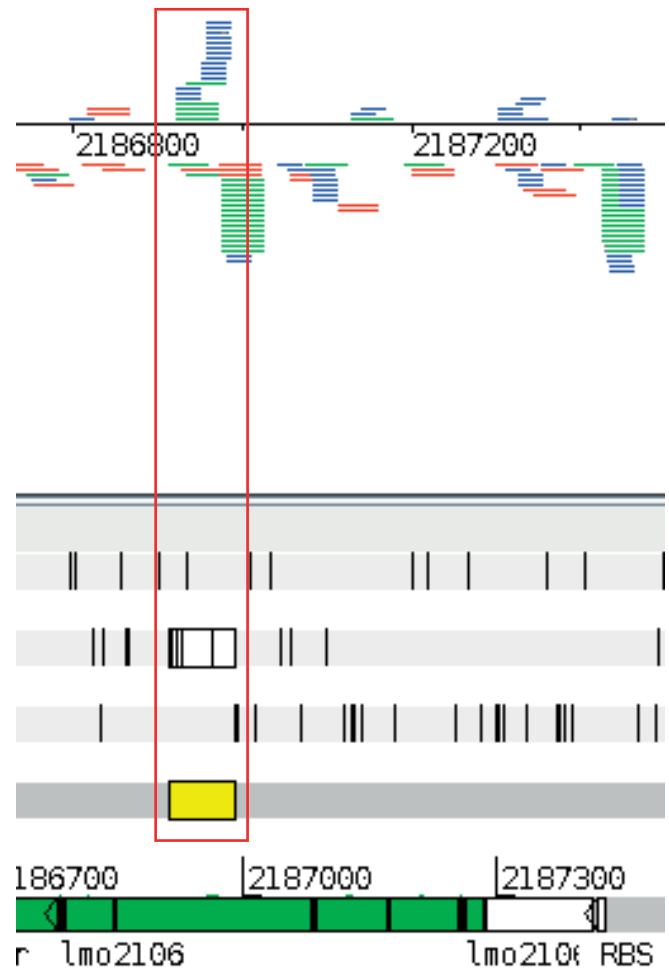

# anti2130

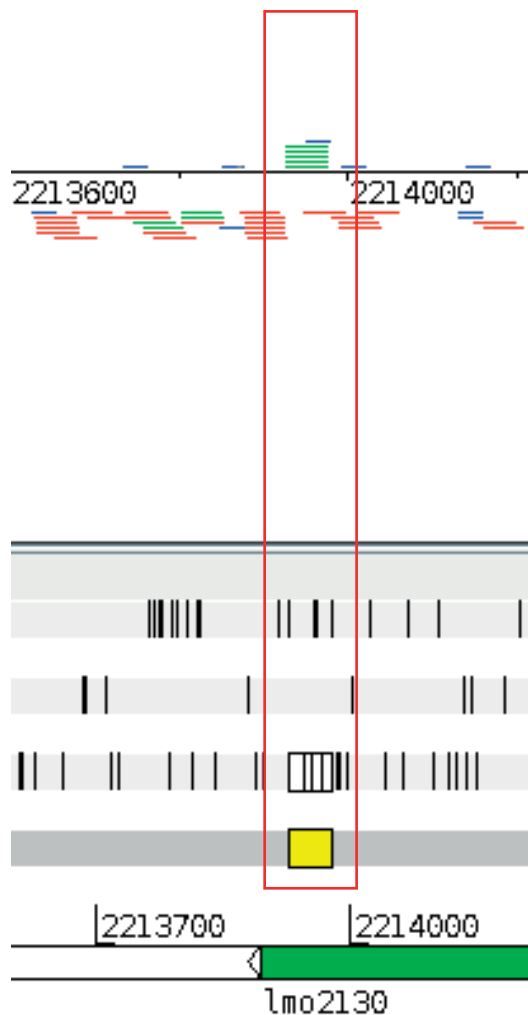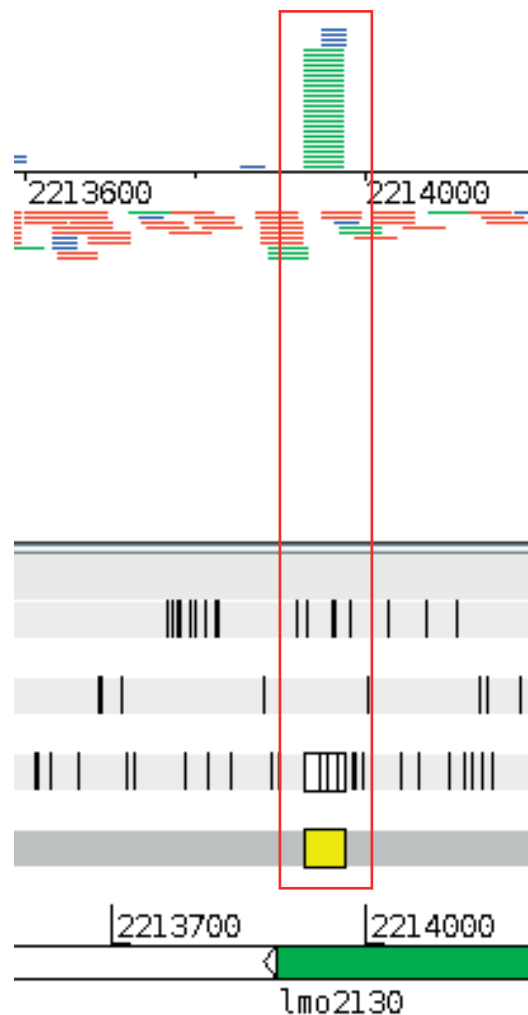

# anti2224

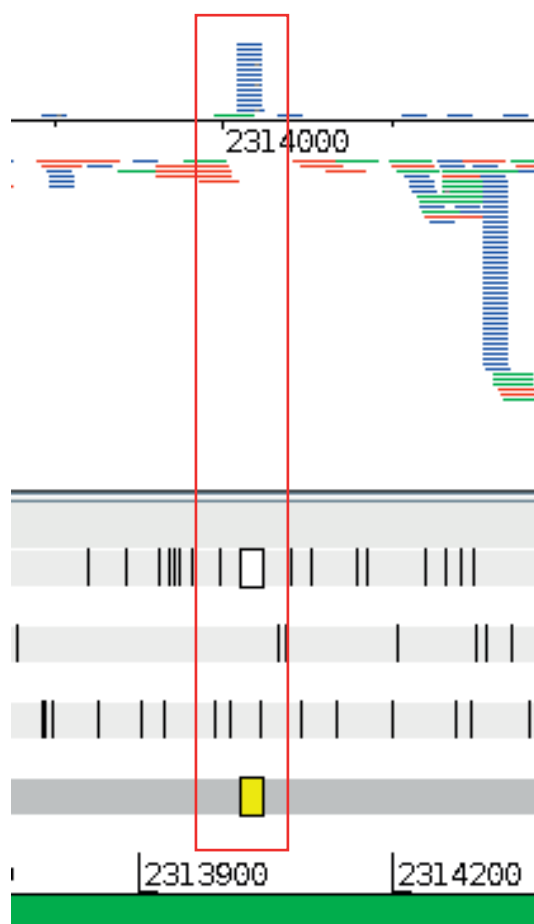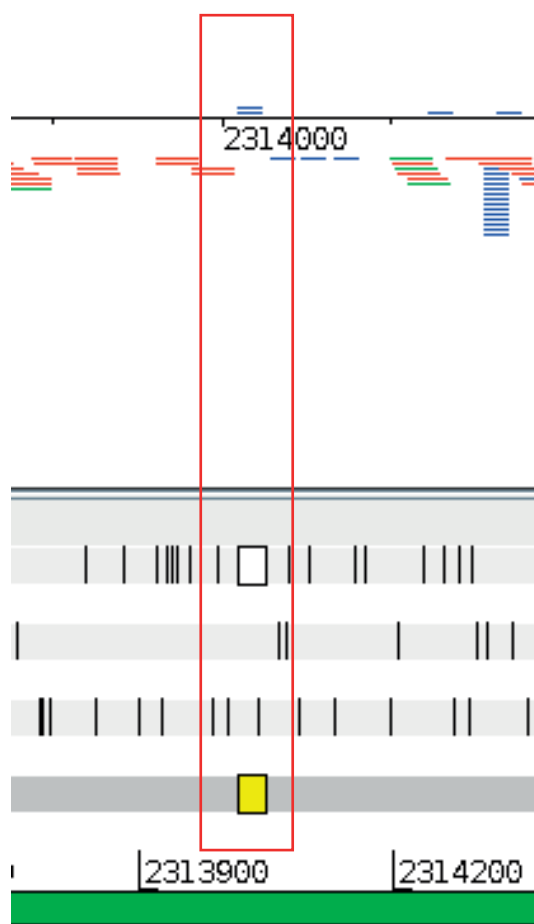

# anti2378

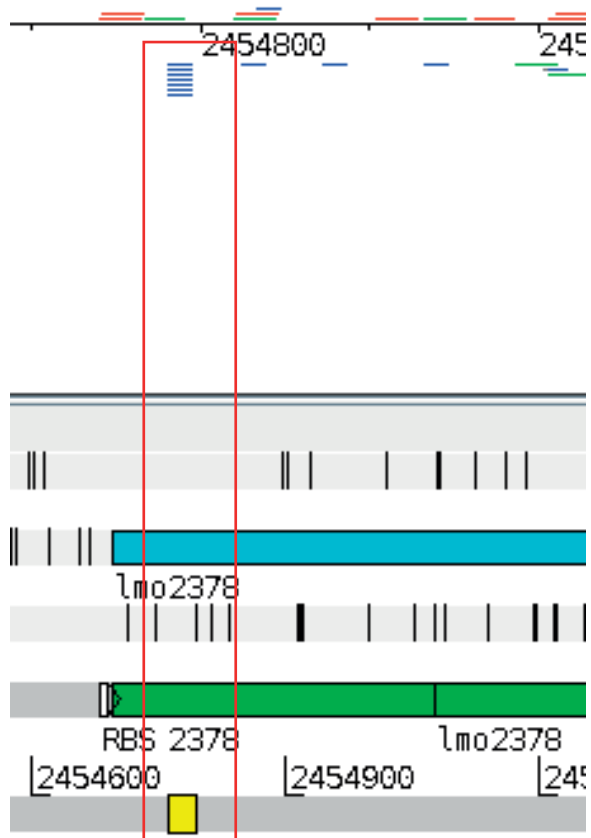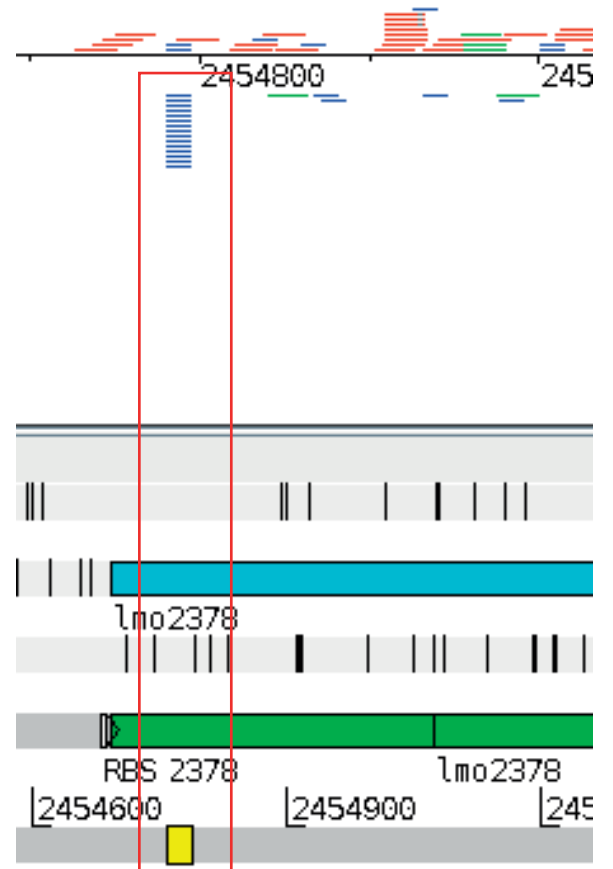

Supplement: pone.0083979.s006.pdf [file pone.0083979.s006.pdf]
